# Supplementary material for: Molecular effect of an OPTN common variant associated to Paget's disease of bone
Source: PLoS One. 2018 May 21;13(5):e0197543. doi: 10.1371/journal.pone.0197543 (PMC5962077; doi:10.1371/journal.pone.0197543)
Supplement: S3 Table — All 232 patients were non-carrier of the P392L mutation within the SQSTM1 gene (PDB3 locus). (XLSX) [file pone.0197543.s006.xlsx]

## Sheet: Sheet1
Table S3a - Comparisons of main clinical characteristics between French-Canadian PDB patients carriers of the rs1561570 TT or TC genotype and the CC genotype carriers, considered as the reference. All 232 patients were non-carrier of the P392L mutation within the SQSTM1 gene (PDB3 locus).
	Categories of patients			Comparison of TC to CC genotype	Comparison of TT to CC genotype
	CC genotype (n=35)	TC genotype	TT genotype	p value	p value
		(n=97)	(n=100)
Male sex, n (%)	22 (63)	57 (59)	59 (59)	0.67	0.69
Age at diagnosis (years), mean ± SD	61.9±8.7	62.7±12.3	63.2±11.4	0.74	0.57
Total sALP levels*	2.6±1.6	3.1±3.4	3.3±3.4	0.39	0.23
Monostotic involvement, n (%)	17 (48.6)	48 (49.5)	41 (41.0)	0.93	0.44
Number of affected bones, mean ± SD	2.3±1.8	2.4±2.0	2.6±2.2	0.93	0.51
Renier’s index (%), mean ± SD	9.2±7.4	9.8±8.1	10.7±8.9	0.72	0.38
* sALP = serum phosphatase alkaline; for total sALP levels, values are the number of time the Mid point of Normal range ± SD
